# Supplementary material for: DFT study of intramolecular interring η6,η6-haptotropic rearrangements in tricarbonylchromium complexes of 2-aminobiphenyl and 4-aminobiphenyl
Source: Royal Society of Chemistry journal article supplement (doi:10.1039/c3dt50655j), 2013-01-01
Supplement: c3dt50655j.pdf [file c3dt50655j.pdf]

Supporting Information

**DFT study of intramolecular interring  $\eta^6,\eta^6$ -haptotropic  
rearrangements in tricarbonylchromium complexes of 2-aminobiphenyl  
and 4-aminobiphenyl**

**Curtis J. Czerwinski, Evgenii O. Fetisov, Igor P. Gloriozov and Yuri F. Oprunenko**

**Section S1. Cartesian coordinates of stationary points discussed in the paper and their total energies** (geometries were optimized in gas phase by PBE/TZV2p; energies are given in a.u., coordinates are given in Å)

**1 → 2**

**1**

E = -236.382971 E0 = -236.163321  
24 -1.35883195 -0.17591830 1.68177891  
6 -0.27683117 1.31305076 1.61361213  
6 -0.89688481 -0.62403188 -0.49915602  
6 -2.08341867 0.18015692 -0.38936713  
6 -3.17261995 -0.22713303 0.41040793  
6 -3.10448076 -1.44354731 1.15204238  
6 -1.93387168 -2.22798516 1.08314004  
6 -0.83979179 -1.82120726 0.26403088  
6 0.22345922 -0.21209450 -1.37528959  
6 1.56737462 -0.45352614 -1.02647600  
6 2.61118682 -0.08151586 -1.86797534  
6 2.35289890 0.55270512 -3.10267142  
6 1.01015812 0.79545738 -3.45792712  
6 -0.02862226 0.42360685 -2.60631405  
6 -2.29731757 0.64818000 3.03199048  
8 -2.89945592 1.16586887 3.88861141  
8 0.48558938 -1.28692666 3.78402606  
6 -0.23221669 -0.85155868 2.97178780  
1 -2.12148279 1.14395591 -0.89494923  
1 -4.04465146 0.41874644 0.50366270  
1 -3.92412169 -1.73497061 1.80662571  
1 -1.84822954 -3.13300088 1.68299089  
1 0.05815771 -2.43655594 0.22785720  
1 1.80141928 -0.89940981 -0.05788759

|   |             |             |             |
|---|-------------|-------------|-------------|
| 1 | 3.64372726  | -0.26491277 | -1.56207099 |
| 7 | 3.39380690  | 0.87785466  | -3.96941668 |
| 1 | 0.78201555  | 1.27434364  | -4.41280007 |
| 1 | -1.05747431 | 0.60913727  | -2.92110925 |
| 8 | 0.41262518  | 2.25358698  | 1.56454096  |
| 1 | 3.19292479  | 1.60941970  | -4.64403766 |
| 1 | 4.30690572  | 0.98479227  | -3.53870567 |

### 1-TS1

E = -236.332205 E0 = -236.114253

|    |             |             |             |
|----|-------------|-------------|-------------|
| 24 | -0.70143458 | 0.19563001  | 1.30208271  |
| 6  | -0.22775813 | 1.94004927  | 1.19733982  |
| 6  | -1.16460018 | -0.87127946 | -0.57551200 |
| 6  | -2.36017117 | -0.09638606 | -0.54863404 |
| 6  | -3.46256306 | -0.49092846 | 0.23561876  |
| 6  | -3.38982232 | -1.61604511 | 1.06331374  |
| 6  | -2.17146621 | -2.31088238 | 1.14816324  |
| 6  | -1.08134240 | -1.97973461 | 0.32114517  |
| 6  | 0.02598932  | -0.41844365 | -1.33098832 |
| 6  | 1.33126350  | -0.84259353 | -0.98012342 |
| 6  | 2.45456665  | -0.38066698 | -1.65845473 |
| 6  | 2.32712255  | 0.52418013  | -2.73213219 |
| 6  | 1.02539909  | 0.93217261  | -3.11033908 |
| 6  | -0.08867627 | 0.47849265  | -2.42110067 |
| 6  | -1.64317153 | 0.57248368  | 2.79931200  |
| 8  | -2.25056553 | 0.81872550  | 3.77265994  |
| 8  | 1.70228162  | -0.20245426 | 3.02818738  |
| 6  | 0.75598234  | -0.04968026 | 2.34879236  |
| 1  | -2.43766987 | 0.80417570  | -1.15544752 |
| 1  | -4.37099855 | 0.11307889  | 0.21082533  |
| 1  | -4.23289443 | -1.89994293 | 1.69203646  |

|   |             |             |             |
|---|-------------|-------------|-------------|
| 1 | -2.06965058 | -3.14996081 | 1.83824318  |
| 1 | -0.19508134 | -2.61164357 | 0.33378152  |
| 1 | 1.48341714  | -1.52043598 | -0.14106782 |
| 1 | 3.44655790  | -0.70832429 | -1.34137369 |
| 7 | 3.43620296  | 0.95949832  | -3.43633491 |
| 1 | 0.89901688  | 1.61505092  | -3.95314998 |
| 1 | -1.07251798 | 0.81157206  | -2.75302680 |
| 8 | 0.09009824  | 3.06855420  | 1.13150710  |
| 1 | 3.33089078  | 1.81292577  | -3.97447767 |
| 1 | 4.33354157  | 0.87938062  | -2.96989425 |

### 1-IM

E = -236.338762 E0 = -236.120485

|    |             |             |             |
|----|-------------|-------------|-------------|
| 24 | -0.18291518 | 0.83611977  | 0.57614841  |
| 6  | -1.11622334 | 2.06141513  | 1.54976244  |
| 6  | -1.23404929 | -0.86336565 | -0.49711916 |
| 6  | -2.25402880 | 0.13217679  | -0.39821870 |
| 6  | -3.44998379 | -0.13877063 | 0.30752201  |
| 6  | -3.62545020 | -1.35841005 | 0.94492598  |
| 6  | -2.61079432 | -2.33909282 | 0.88074337  |
| 6  | -1.43506140 | -2.09599125 | 0.18577376  |
| 6  | 0.03223800  | -0.52887429 | -1.18572554 |
| 6  | 1.28025183  | -0.98359557 | -0.66654044 |
| 6  | 2.49221782  | -0.63388059 | -1.27579135 |
| 6  | 2.52312712  | 0.22740729  | -2.38436308 |
| 6  | 1.28844352  | 0.71299008  | -2.88940525 |
| 6  | 0.08446794  | 0.35743711  | -2.30150491 |
| 6  | 0.24421340  | 0.07694879  | 2.15220195  |
| 8  | 0.52167575  | -0.41958942 | 3.18047445  |
| 8  | 2.25005912  | 2.57189491  | 0.76397843  |
| 6  | 1.29211228  | 1.89857508  | 0.69761711  |

|   |             |             |             |
|---|-------------|-------------|-------------|
| 1 | -2.19688100 | 1.04740436  | -0.99670081 |
| 1 | -4.22590995 | 0.62623729  | 0.35301819  |
| 1 | -4.54135494 | -1.55830601 | 1.50206381  |
| 1 | -2.74838071 | -3.29590660 | 1.38628364  |
| 1 | -0.66554449 | -2.86730711 | 0.13237593  |
| 1 | 1.29709756  | -1.67242882 | 0.17724891  |
| 1 | 3.42693188  | -1.01220412 | -0.85755847 |
| 7 | 3.71548956  | 0.56409641  | -3.00780647 |
| 1 | 1.28719086  | 1.37774664  | -3.75584104 |
| 1 | -0.84427547 | 0.72966595  | -2.73726565 |
| 8 | -1.71368034 | 2.84423343  | 2.18533237  |
| 1 | 3.70810007  | 1.42030920  | -3.55278471 |
| 1 | 4.55555188  | 0.46055483  | -2.44751688 |

### 1-TS2

E = -236.331434 E0 = -236.113421

|    |             |             |             |
|----|-------------|-------------|-------------|
| 24 | 0.20041222  | 0.88901373  | 0.47901345  |
| 6  | -0.64667978 | 2.44059347  | 0.87129933  |
| 6  | -1.44426863 | -1.08080533 | -0.45858936 |
| 6  | -2.54158302 | -0.19677608 | -0.32822278 |
| 6  | -3.71486869 | -0.60308190 | 0.31930695  |
| 6  | -3.82731298 | -1.89802002 | 0.82937799  |
| 6  | -2.75601701 | -2.79329061 | 0.68549054  |
| 6  | -1.58042273 | -2.39152893 | 0.05525505  |
| 6  | -0.17450744 | -0.62807266 | -1.08680524 |
| 6  | 1.07876218  | -1.20757296 | -0.74216859 |
| 6  | 2.28141005  | -0.75151587 | -1.30169391 |
| 6  | 2.30757704  | 0.37738392  | -2.14190323 |
| 6  | 1.07525424  | 1.02693141  | -2.40579465 |
| 6  | -0.13954564 | 0.51997277  | -1.93277888 |
| 6  | 0.04122131  | 0.44567692  | 2.22691250  |

|   |             |             |             |
|---|-------------|-------------|-------------|
| 8 | -0.05868326 | 0.16509410  | 3.36216308  |
| 8 | 2.77559706  | 2.24174635  | 1.11873854  |
| 6 | 1.75660140  | 1.71135030  | 0.86759251  |
| 1 | -2.48217681 | 0.82028251  | -0.71584390 |
| 1 | -4.53760969 | 0.10464752  | 0.42869829  |
| 1 | -4.74188844 | -2.21352820 | 1.33323445  |
| 1 | -2.84046972 | -3.81156516 | 1.06826744  |
| 1 | -0.76663695 | -3.10842194 | -0.05992504 |
| 1 | 1.11193354  | -2.04501593 | -0.04601545 |
| 1 | 3.21607902  | -1.24494832 | -1.02755719 |
| 7 | 3.48821858  | 0.84339661  | -2.69900178 |
| 1 | 1.06554009  | 1.92492031  | -3.02767201 |
| 1 | -1.06568190 | 0.99482871  | -2.25408779 |
| 8 | -1.19023501 | 3.45051567  | 1.12602525  |
| 1 | 3.49014542  | 1.81798952  | -2.98418797 |
| 1 | 4.34178193  | 0.57636805  | -2.21817596 |

## 2

E = -236.383984 E0 = -236.164208

|    |             |             |             |
|----|-------------|-------------|-------------|
| 24 | -1.09395695 | -0.01980588 | 2.00511716  |
| 6  | -0.60016529 | 1.74660527  | 2.13695553  |
| 6  | -0.66628330 | -0.45786827 | -0.16744096 |
| 6  | -1.79570717 | 0.40392819  | -0.03764717 |
| 6  | -2.93926576 | 0.03840433  | 0.71655352  |
| 6  | -2.99122945 | -1.21804847 | 1.38738279  |
| 6  | -1.83148532 | -2.04334685 | 1.35584044  |
| 6  | -0.69355028 | -1.65912049 | 0.60061213  |
| 6  | 0.48971276  | -0.10348491 | -1.02931373 |
| 6  | 1.81277760  | -0.41128129 | -0.65601426 |
| 6  | 2.88125206  | -0.09300520 | -1.49776518 |
| 6  | 2.65145825  | 0.54264354  | -2.72504292 |

|   |             |             |             |
|---|-------------|-------------|-------------|
| 6 | 1.34177261  | 0.85575214  | -3.10479624 |
| 6 | 0.26990376  | 0.53340823  | -2.26596428 |
| 6 | -1.89372818 | 0.11109476  | 3.65403447  |
| 8 | -2.43156754 | 0.17433027  | 4.69115179  |
| 8 | 1.50938038  | -0.66205404 | 3.36391936  |
| 6 | 0.49152787  | -0.41524150 | 2.84344349  |
| 1 | -1.77663215 | 1.38143297  | -0.51851004 |
| 1 | -3.77738311 | 0.73017781  | 0.79618395  |
| 7 | -4.13893789 | -1.62639034 | 2.04493831  |
| 1 | -1.81404992 | -2.97577540 | 1.91941142  |
| 1 | 0.17249170  | -2.32016331 | 0.58765984  |
| 1 | 2.01153044  | -0.86465526 | 0.31670384  |
| 1 | 3.90038885  | -0.32651568 | -1.18502659 |
| 1 | 1.15062001  | 1.34695652  | -4.06041658 |
| 1 | -0.74973879 | 0.75743851  | -2.58547922 |
| 8 | -0.27595754 | 2.86598455  | 2.21585267  |
| 1 | 3.48841207  | 0.79557151  | -3.37765166 |
| 1 | -3.99712514 | -2.31169841 | 2.78215165  |
| 1 | -4.76111799 | -0.87822634 | 2.33879042  |

**3a → 4b**

**3a**

E = -236.379557 E0 = -236.159791

|    |             |             |             |
|----|-------------|-------------|-------------|
| 24 | -1.10066244 | -0.08413751 | 2.05429878  |
| 6  | -0.04965315 | 1.42957061  | 2.10816318  |
| 6  | -0.72198562 | -0.38820663 | -0.15819848 |
| 6  | -1.83361388 | 0.50097378  | 0.05211841  |
| 6  | -2.94131608 | 0.11363329  | 0.83879310  |
| 6  | -2.94923132 | -1.16010283 | 1.48201618  |
| 6  | -1.85269555 | -2.03353137 | 1.31794280  |
| 6  | -0.74460904 | -1.64313527 | 0.50797828  |

|   |             |             |             |
|---|-------------|-------------|-------------|
| 6 | 0.42295492  | -0.00453164 | -1.02989461 |
| 6 | 1.74479844  | -0.10181456 | -0.55898183 |
| 6 | 2.83570232  | 0.23747594  | -1.36046425 |
| 6 | 2.60657855  | 0.68807646  | -2.66718817 |
| 6 | 1.30603308  | 0.78148376  | -3.15999243 |
| 6 | 0.19641898  | 0.43262368  | -2.36330070 |
| 6 | -1.94357663 | 0.53684016  | 3.56838849  |
| 8 | -2.48444535 | 0.92672300  | 4.52638676  |
| 8 | 0.92262923  | -1.40128419 | 3.85237236  |
| 6 | 0.13549671  | -0.88911499 | 3.15885897  |
| 1 | -1.80578537 | 1.49471675  | -0.39294617 |
| 1 | -3.75745734 | 0.81473630  | 1.00683099  |
| 1 | -3.77653516 | -1.43780468 | 2.13340975  |
| 1 | -1.82938382 | -2.98710492 | 1.84320428  |
| 1 | 0.10987852  | -2.31140432 | 0.40354308  |
| 1 | 1.90416772  | -0.42066617 | 0.47297780  |
| 1 | 3.84908353  | 0.16928025  | -0.96480050 |
| 1 | 3.44440611  | 0.96797063  | -3.30802982 |
| 1 | 1.13392560  | 1.12420588  | -4.18336291 |
| 7 | -1.09765876 | 0.55838068  | -2.88490390 |
| 8 | 0.61621455  | 2.38624487  | 2.14032837  |
| 1 | -1.13596720 | 0.57354649  | -3.90005284 |
| 1 | -1.78909102 | -0.07455427 | -2.49194487 |

### 3-TS1'

E = -236.323750 E0 = -236.106253

|    |             |             |             |
|----|-------------|-------------|-------------|
| 24 | -0.26125232 | 0.37372579  | 1.75421115  |
| 6  | 0.24826798  | 2.11414787  | 1.74219817  |
| 6  | -0.78420696 | -0.58794989 | -0.19829724 |
| 6  | -1.97246165 | 0.19282613  | -0.09026636 |
| 6  | -3.07960884 | -0.26512954 | 0.65963592  |



|   |             |             |             |
|---|-------------|-------------|-------------|
| 6 | -2.98603423 | -1.42610346 | 1.42502561  |
| 6 | -1.74766976 | -2.09700766 | 1.48566860  |
| 6 | -0.67793502 | -1.73337706 | 0.64853897  |
| 6 | 0.38246553  | -0.15131851 | -1.00953671 |
| 6 | 1.67666171  | -0.26918012 | -0.45141292 |
| 6 | 2.81137578  | 0.21907525  | -1.09972228 |
| 6 | 2.66421321  | 0.81208476  | -2.35906393 |
| 6 | 1.40857376  | 0.89401299  | -2.95938237 |
| 6 | 0.24976664  | 0.41498451  | -2.31445365 |
| 6 | -1.35614946 | 0.74718611  | 3.14007560  |
| 8 | -2.06234605 | 0.99291814  | 4.04392954  |
| 8 | 1.88014445  | -0.12203034 | 3.77898626  |
| 6 | 1.04580548  | 0.06891703  | 2.97616920  |
| 1 | -2.04357114 | 1.14296953  | -0.62084492 |
| 1 | -3.99570300 | 0.32770482  | 0.66910723  |
| 1 | -3.82516596 | -1.76327333 | 2.03237348  |
| 1 | -1.62732913 | -2.95721992 | 2.14608479  |
| 1 | 0.21605195  | -2.35544825 | 0.60880712  |
| 1 | 1.78856263  | -0.73665898 | 0.53115910  |
| 1 | 3.78913275  | 0.14274525  | -0.62547689 |
| 1 | 3.53522966  | 1.20336936  | -2.88729190 |
| 1 | 1.31219018  | 1.32408042  | -3.95907121 |
| 7 | -0.95346285 | 0.40941449  | -3.00500363 |
| 8 | 0.57687661  | 3.23980424  | 1.74457353  |
| 1 | -1.04268289 | 1.05390805  | -3.78166395 |
| 1 | -1.80809384 | 0.24490390  | -2.48899942 |

### 3-IM

E = -236.334163 E0 = -236.116305

|    |            |            |            |
|----|------------|------------|------------|
| 24 | 0.00929797 | 0.92318360 | 1.06872770 |
|----|------------|------------|------------|

|   |             |            |            |
|---|-------------|------------|------------|
| 6 | -0.99113867 | 2.04604980 | 2.10293410 |
|---|-------------|------------|------------|

|   |             |             |             |
|---|-------------|-------------|-------------|
| 6 | -0.97081041 | -0.73998771 | -0.11795327 |
| 6 | -1.97922772 | 0.26647961  | 0.05417289  |
| 6 | -3.19842937 | -0.04741038 | 0.70558719  |
| 6 | -3.40190870 | -1.31368772 | 1.23092258  |
| 6 | -2.39594526 | -2.29995123 | 1.11149932  |
| 6 | -1.20246200 | -2.01863045 | 0.46331914  |
| 6 | 0.32277780  | -0.36459577 | -0.74119755 |
| 6 | 1.53833433  | -0.74133089 | -0.08480223 |
| 6 | 2.79174833  | -0.34661694 | -0.58170799 |
| 6 | 2.85236305  | 0.46723743  | -1.71141810 |
| 6 | 1.68370231  | 0.84183724  | -2.38468734 |
| 6 | 0.41549391  | 0.41417657  | -1.95107302 |
| 6 | 0.46539971  | 0.13110654  | 2.62244520  |
| 8 | 0.75185236  | -0.38951276 | 3.63502296  |
| 8 | 2.29218298  | 2.84962652  | 1.33823054  |
| 6 | 1.40408895  | 2.09548540  | 1.23495240  |
| 1 | -1.89626512 | 1.23387545  | -0.45889474 |
| 1 | -3.96450193 | 0.72271937  | 0.80265023  |
| 1 | -4.33382151 | -1.54735179 | 1.74685968  |
| 1 | -2.55718104 | -3.29219827 | 1.53499560  |
| 1 | -0.43738145 | -2.79021716 | 0.36533013  |
| 1 | 1.48971223  | -1.43212508 | 0.75591346  |
| 1 | 3.70024956  | -0.66239793 | -0.06998248 |
| 1 | 3.81643093  | 0.80891036  | -2.09054523 |
| 1 | 1.75225536  | 1.43531906  | -3.29909506 |
| 7 | -0.69514672 | 0.63409099  | -2.74292321 |
| 8 | -1.62906107 | 2.75790251  | 2.78012949  |
| 1 | -0.65912604 | 1.39240542  | -3.41361866 |
| 1 | -1.61183753 | 0.41968977  | -2.36973684 |

**3-TS2'**

E = -236.323700 E0 = -236.105611

|    |             |             |             |
|----|-------------|-------------|-------------|
| 24 | 0.40180056  | 1.03575555  | 1.08651052  |
| 6  | -0.65008022 | 2.37658836  | 1.68972593  |
| 6  | -1.23964693 | -0.97840384 | -0.15378852 |
| 6  | -2.32242161 | -0.14303743 | 0.20398944  |
| 6  | -3.51048263 | -0.68761128 | 0.70762425  |
| 6  | -3.64727234 | -2.07163848 | 0.84399492  |
| 6  | -2.58564220 | -2.91241938 | 0.48187856  |
| 6  | -1.39365398 | -2.37309436 | -0.00475013 |
| 6  | 0.06829599  | -0.41910784 | -0.61502394 |
| 6  | 1.27398011  | -0.95516564 | -0.06659499 |
| 6  | 2.53222300  | -0.48698666 | -0.46828606 |
| 6  | 2.61852328  | 0.52254682  | -1.43924945 |
| 6  | 1.45744165  | 1.07312240  | -1.97817435 |
| 6  | 0.16682350  | 0.60216376  | -1.62025554 |
| 6  | 0.59449919  | 0.51234200  | 2.80431995  |
| 8  | 0.73407199  | 0.17898718  | 3.92141465  |
| 8  | 2.73220694  | 2.84376343  | 1.47240513  |
| 6  | 1.81146134  | 2.13083381  | 1.31957743  |
| 1  | -2.22507733 | 0.94355450  | 0.13488666  |
| 1  | -4.32269504 | -0.02234802 | 1.00348001  |
| 1  | -4.57408021 | -2.49538078 | 1.23326339  |
| 1  | -2.68690178 | -3.99431608 | 0.58094047  |
| 1  | -0.57599972 | -3.03642624 | -0.29096815 |
| 1  | 1.19972197  | -1.75674312 | 0.66834093  |
| 1  | 3.43307622  | -0.90263431 | -0.01717115 |
| 1  | 3.59012929  | 0.90985004  | -1.74587347 |
| 1  | 1.53046008  | 1.85670588  | -2.73567213 |
| 7  | -0.93802456 | 1.03137828  | -2.33547329 |
| 8  | -1.33518256 | 3.24947903  | 2.08167773  |
| 1  | -0.87082242 | 1.94549231  | -2.77013142 |

1 -1.85211104 0.82183931 -1.94906727

#### 4b

E = -236.383232 E0 = -236.163297

24 -0.58264363 0.17882713 1.67225110  
6 0.17231841 1.85092093 1.81214633  
6 -0.16281858 -0.20884783 -0.53475261  
6 -1.24462625 0.70990452 -0.36213091  
6 -2.39420455 0.38745054 0.39521250  
6 -2.42760630 -0.85717045 1.07812962  
6 -1.36983241 -1.78434031 0.93196365  
6 -0.25513560 -1.50017302 0.08221713  
6 0.98647920 0.14063535 -1.42214114  
6 2.29966208 0.26354301 -0.92882098  
6 3.35483869 0.57802212 -1.79277824  
6 3.11393347 0.78146110 -3.15696117  
6 1.81044778 0.66995753 -3.65463039  
6 0.75440413 0.34882237 -2.79478115  
6 -1.34350345 0.48821577 3.31441794  
8 -1.83076629 0.69155016 4.35730217  
8 1.81851858 -0.99467208 3.04932971  
6 0.88247603 -0.52056556 2.52873930  
1 -1.15859733 1.69307319 -0.82477782  
1 -3.19096733 1.11636719 0.52844858  
1 -1.40242912 -2.73299139 1.46742788  
7 0.69715263 -2.46979471 -0.15548751  
1 2.48189552 0.14829686 0.14163737  
1 4.36503802 0.68329770 -1.39355664  
1 1.61323944 0.83128292 -4.71579916  
1 -0.25951504 0.25065562 -3.18800376  
8 0.65344940 2.91169198 1.90282701

1 3.93704192 1.03407012 -3.82714134  
1 -3.26345577 -1.10090801 1.73246097  
1 1.58494166 -2.13359068 -0.52045256  
1 0.79976979 -3.18096946 0.56198642

**3b → 4a**

**3b**

E = -236.379043 E0 = -236.158812

24 -0.75045439 -0.04410796 1.99245458  
6 0.44816698 1.33379717 2.19119644  
6 -0.42470867 -0.36636152 -0.28237202  
6 -1.54415161 0.50338845 -0.04467261  
6 -2.61084561 0.11023682 0.79044209  
6 -2.59434708 -1.15741214 1.44303103  
6 -1.48155088 -2.00341286 1.26249936  
6 -0.40115250 -1.60174446 0.42350077  
6 0.62137941 -0.06622995 -1.29507273  
6 1.11236317 -1.14611661 -2.06111612  
6 2.04606772 -0.97643231 -3.08185807  
6 2.51675766 0.31325800 -3.36164058  
6 2.05386123 1.39842345 -2.62310024  
6 1.11076523 1.24162932 -1.58449379  
6 -1.62927889 0.69291176 3.42790710  
8 -2.19625062 1.15556299 4.33763823  
8 1.00073076 -1.53499860 3.92955989  
6 0.32266014 -0.95160756 3.18050063  
1 -1.58459339 1.47391230 -0.53586969  
1 -3.43962209 0.79682177 0.95806741  
1 -3.40323293 -1.44332691 2.11308553  
1 -1.42162130 -2.94836520 1.80083741  
1 0.47227792 -2.24621554 0.33998795

|   |            |             |             |
|---|------------|-------------|-------------|
| 1 | 0.71335946 | -2.14364997 | -1.87049815 |
| 1 | 2.39122773 | -1.83477408 | -3.65826063 |
| 1 | 3.24755693 | 0.47480424  | -4.15581216 |
| 1 | 2.42960769 | 2.40197338  | -2.83727324 |
| 7 | 0.66304016 | 2.37398218  | -0.90503001 |
| 8 | 1.20998146 | 2.20359275  | 2.38533514  |
| 1 | 1.27721175 | 3.17829802  | -1.00241414 |
| 1 | 0.41042855 | 2.22481719  | 0.06962215  |

### 3-TS1

E = -236.329368 E0 = -236.110882

|    |             |             |             |
|----|-------------|-------------|-------------|
| 24 | 0.36896750  | 0.78218742  | 1.52980732  |
| 6  | 2.08809799  | 1.23210201  | 1.92564172  |
| 6  | -0.20637402 | -0.50672986 | -0.68926978 |
| 6  | -1.21119667 | 0.32678281  | -0.10796925 |
| 6  | -1.86934108 | -0.07322689 | 1.08033272  |
| 6  | -1.52661102 | -1.29432990 | 1.69458244  |
| 6  | -0.50589936 | -2.08906057 | 1.16468113  |
| 6  | 0.16392094  | -1.67990903 | -0.00779493 |
| 6  | 0.53875976  | -0.11033555 | -1.90691542 |
| 6  | 0.69376967  | -0.99937445 | -2.98547365 |
| 6  | 1.50414694  | -0.67231503 | -4.07608524 |
| 6  | 2.18868900  | 0.54936211  | -4.08986431 |
| 6  | 2.04113999  | 1.44554047  | -3.02722043 |
| 6  | 1.20883207  | 1.13644590  | -1.94030156 |
| 6  | -0.05072320 | 2.47065873  | 1.96668527  |
| 8  | -0.31709643 | 3.58179444  | 2.25461125  |
| 8  | 0.07622590  | 0.16429356  | 4.43454855  |
| 6  | 0.17437946  | 0.38249374  | 3.28472051  |
| 1  | -1.56804855 | 1.20679349  | -0.64316305 |
| 1  | -2.67011349 | 0.54114700  | 1.49017688  |

|   |             |             |             |
|---|-------------|-------------|-------------|
| 1 | -2.02401626 | -1.58669659 | 2.61977069  |
| 1 | -0.19667039 | -2.99974768 | 1.67745444  |
| 1 | 0.98676911  | -2.27956784 | -0.40050722 |
| 1 | 0.16941037  | -1.95678147 | -2.96172743 |
| 1 | 1.60708455  | -1.37061277 | -4.90753573 |
| 1 | 2.83301727  | 0.80970248  | -4.93096562 |
| 1 | 2.57510929  | 2.39862969  | -3.03583104 |
| 7 | 1.11389092  | 1.98284732  | -0.79637949 |
| 8 | 3.17957884  | 1.56442892  | 2.19767666  |
| 1 | 1.91083106  | 2.61319287  | -0.70638249 |
| 1 | 0.26034896  | 2.53836305  | -0.75651138 |

### 3-IM1

E = -236.340093 E0 = -236.120303

|    |             |             |             |
|----|-------------|-------------|-------------|
| 24 | 0.52062657  | 1.05232389  | 1.33677663  |
| 6  | 2.18127389  | 1.56944987  | 1.87565674  |
| 6  | -0.28925369 | -0.61435820 | -0.62639953 |
| 6  | -1.19333208 | 0.31747721  | -0.03103595 |
| 6  | -1.86579215 | -0.03186840 | 1.16016763  |
| 6  | -1.81096548 | -1.36265510 | 1.64199644  |
| 6  | -0.97915508 | -2.28702906 | 1.02565245  |
| 6  | -0.17103201 | -1.89400428 | -0.06312651 |
| 6  | 0.54295818  | -0.20901066 | -1.78275427 |
| 6  | 0.78020750  | -1.08549006 | -2.85953035 |
| 6  | 1.62007178  | -0.72435818 | -3.91491247 |
| 6  | 2.24813006  | 0.52703472  | -3.91049912 |
| 6  | 2.01787994  | 1.41373003  | -2.85446995 |
| 6  | 1.16466264  | 1.06030680  | -1.80192826 |
| 6  | -0.11199448 | 2.52848050  | 2.14300692  |
| 8  | -0.53416423 | 3.49318175  | 2.67231538  |
| 8  | 0.39962799  | -0.33865324 | 3.98937962  |

|   |             |             |             |
|---|-------------|-------------|-------------|
| 6 | 0.41712683  | 0.18874136  | 2.94142123  |
| 1 | -1.47202201 | 1.23040779  | -0.55774019 |
| 1 | -2.54675270 | 0.68416483  | 1.62021793  |
| 1 | -2.39261339 | -1.64108660 | 2.52107673  |
| 1 | -0.90189063 | -3.30293982 | 1.41447664  |
| 1 | 0.55861429  | -2.59284393 | -0.47645096 |
| 1 | 0.28536889  | -2.05818735 | -2.86580912 |
| 1 | 1.78596506  | -1.41900119 | -4.73932153 |
| 1 | 2.91318390  | 0.81520969  | -4.72554281 |
| 1 | 2.50995845  | 2.38927266  | -2.84221826 |
| 7 | 0.98203594  | 1.95683899  | -0.66956079 |
| 8 | 3.23826163  | 1.91133915  | 2.25785351  |
| 1 | 1.80947586  | 2.54860894  | -0.56655230 |
| 1 | 0.19938036  | 2.59703386  | -0.83367143 |

### 3-TS2

E = -236.338820 E0 = -236.119009

|    |             |             |             |
|----|-------------|-------------|-------------|
| 24 | 0.88722151  | 1.03958686  | 1.00143098  |
| 6  | 2.46603844  | 1.77981356  | 1.51349432  |
| 6  | -0.36091389 | -0.43940801 | -0.44836716 |
| 6  | -1.35409461 | 0.44170083  | 0.06962566  |
| 6  | -2.25263599 | -0.00701930 | 1.06440094  |
| 6  | -2.19940060 | -1.31129297 | 1.54083402  |
| 6  | -1.22865414 | -2.19728246 | 1.03340960  |
| 6  | -0.32025186 | -1.76636003 | 0.07719364  |
| 6  | 0.53745326  | -0.09222525 | -1.59017222 |
| 6  | 0.92266442  | -1.08860557 | -2.51539710 |
| 6  | 1.82742619  | -0.82712746 | -3.54393638 |
| 6  | 2.38809629  | 0.44937469  | -3.67857544 |
| 6  | 2.01098771  | 1.46016709  | -2.79359191 |
| 6  | 1.08799909  | 1.20376720  | -1.77075417 |



|   |             |             |             |
|---|-------------|-------------|-------------|
| 6 | 0.07380540  | 2.09531928  | 2.21090471  |
| 8 | -0.46059359 | 2.77819352  | 3.00638857  |
| 8 | 1.29834099  | -0.92738267 | 3.22591674  |
| 6 | 1.12779286  | -0.17576398 | 2.33999773  |
| 1 | -1.57371942 | 1.39335110  | -0.41197678 |
| 1 | -3.00243284 | 0.68758923  | 1.44548112  |
| 1 | -2.89473830 | -1.64203365 | 2.31273685  |
| 1 | -1.16021539 | -3.21396721 | 1.42184717  |
| 1 | 0.46404195  | -2.44429037 | -0.26127684 |
| 1 | 0.48395530  | -2.08304825 | -2.43038075 |
| 1 | 2.09703971  | -1.62144740 | -4.24103520 |
| 1 | 3.10856321  | 0.65890414  | -4.46991750 |
| 1 | 2.43633819  | 2.46182785  | -2.88839528 |
| 7 | 0.75201800  | 2.22854143  | -0.80846187 |
| 8 | 3.48059962  | 2.25387214  | 1.87072141  |
| 1 | 1.43349697  | 2.98865342  | -0.82769066 |
| 1 | -0.17038667 | 2.63870822  | -0.97598016 |

### 3-IM2

E = -236.342713 E0 = -236.123008

|    |             |             |             |
|----|-------------|-------------|-------------|
| 24 | 0.98466571  | 1.10363901  | 0.56158494  |
| 6  | 2.64046316  | 1.84934231  | 0.70600072  |
| 6  | -0.50684280 | -0.39007822 | -0.41207264 |
| 6  | -1.42959585 | 0.53746462  | 0.16197188  |
| 6  | -2.34513470 | 0.12724342  | 1.16427676  |
| 6  | -2.36786804 | -1.17749922 | 1.62153043  |
| 6  | -1.46352010 | -2.11220222 | 1.06761135  |
| 6  | -0.55902647 | -1.73100922 | 0.09563966  |
| 6  | 0.50580755  | -0.04265737 | -1.44504840 |
| 6  | 1.15661635  | -1.08145803 | -2.17972463 |
| 6  | 2.18323417  | -0.84086626 | -3.07436343 |

|   |             |             |             |
|---|-------------|-------------|-------------|
| 6 | 2.64722605  | 0.47408569  | -3.29000362 |
| 6 | 2.03732347  | 1.52125851  | -2.62626937 |
| 6 | 0.96932217  | 1.29566896  | -1.72205913 |
| 6 | 0.48604837  | 2.00689056  | 2.06753924  |
| 8 | 0.16581854  | 2.59254740  | 3.03008871  |
| 8 | 2.12637394  | -1.07786625 | 2.27524757  |
| 6 | 1.66230432  | -0.23643842 | 1.60380170  |
| 1 | -1.62768049 | 1.50816993  | -0.27925338 |
| 1 | -3.04313597 | 0.86512575  | 1.56216090  |
| 1 | -3.06811353 | -1.48190650 | 2.39986903  |
| 1 | -1.45263258 | -3.14069888 | 1.43102127  |
| 1 | 0.16622399  | -2.46448896 | -0.25205461 |
| 1 | 0.80190866  | -2.10359417 | -2.06030462 |
| 1 | 2.63198189  | -1.67485674 | -3.61496769 |
| 1 | 3.46933507  | 0.66720500  | -3.97946931 |
| 1 | 2.36569895  | 2.54944796  | -2.79338210 |
| 7 | 0.37305968  | 2.40795596  | -1.04376830 |
| 8 | 3.71444552  | 2.30752284  | 0.82353345  |
| 1 | 0.91604161  | 3.26290613  | -1.16025315 |
| 1 | -0.60346953 | 2.58722478  | -1.28809167 |

### 3-TS3

E = -236.341380 E0 = -236.121804

|    |             |             |             |
|----|-------------|-------------|-------------|
| 24 | 1.04601955  | 1.08073552  | 0.58306539  |
| 6  | 2.66522857  | 1.88308298  | 0.68656665  |
| 6  | -0.58955039 | -0.37809280 | -0.41604994 |
| 6  | -1.69946527 | 0.45739241  | -0.13063753 |
| 6  | -2.68265882 | 0.07741387  | 0.79939396  |
| 6  | -2.59141164 | -1.14086650 | 1.46653843  |
| 6  | -1.49750430 | -1.98525567 | 1.21050919  |
| 6  | -0.51317303 | -1.60581926 | 0.30572927  |

|   |             |             |             |
|---|-------------|-------------|-------------|
| 6 | 0.48286130  | -0.04440806 | -1.39439362 |
| 6 | 1.16504724  | -1.09160940 | -2.08212630 |
| 6 | 2.19334318  | -0.84664803 | -2.97577925 |
| 6 | 2.61092080  | 0.47647688  | -3.23280638 |
| 6 | 1.97573868  | 1.52912190  | -2.59828014 |
| 6 | 0.91658975  | 1.29867738  | -1.68596812 |
| 6 | 0.56396271  | 1.93692674  | 2.12089395  |
| 8 | 0.25932676  | 2.49772606  | 3.10393195  |
| 8 | 2.38132226  | -1.06759322 | 2.19684397  |
| 6 | 1.83064989  | -0.24734464 | 1.56303405  |
| 1 | -1.89303376 | 1.35724829  | -0.71058048 |
| 1 | -3.52240567 | 0.74762857  | 0.98648079  |
| 1 | -3.35217580 | -1.42999053 | 2.19259128  |
| 1 | -1.39391442 | -2.92762761 | 1.74943054  |
| 1 | 0.35451660  | -2.24945562 | 0.16598601  |
| 1 | 0.83383477  | -2.11719956 | -1.92008832 |
| 1 | 2.67948009  | -1.68141838 | -3.48145073 |
| 1 | 3.42912981  | 0.67289090  | -3.92608244 |
| 1 | 2.28701359  | 2.55871526  | -2.78723041 |
| 7 | 0.33042781  | 2.39320494  | -0.97144223 |
| 8 | 3.72492064  | 2.38449174  | 0.77156217  |
| 1 | 0.86049983  | 3.25645679  | -1.08290247 |
| 1 | -0.65869138 | 2.56834956  | -1.14524521 |

### 3-IM3

E = -236.345765 E0 = -236.126180

|    |             |             |             |
|----|-------------|-------------|-------------|
| 24 | 1.21916944  | 0.80870016  | 0.59372797  |
| 6  | 2.73904223  | 1.79858547  | 0.70015048  |
| 6  | -0.63925702 | -0.34863282 | -0.44098836 |
| 6  | -1.89316933 | 0.30987592  | -0.58520761 |
| 6  | -2.91412932 | 0.12232352  | 0.33773873  |

|   |             |             |             |
|---|-------------|-------------|-------------|
| 6 | -2.72342680 | -0.73344978 | 1.44126657  |
| 6 | -1.52623564 | -1.42706107 | 1.57764200  |
| 6 | -0.48494591 | -1.25536637 | 0.64203702  |
| 6 | 0.48610864  | -0.09867963 | -1.38248884 |
| 6 | 1.16839242  | -1.12291830 | -2.09367097 |
| 6 | 2.17527220  | -0.81682299 | -2.99703983 |
| 6 | 2.54722454  | 0.52689121  | -3.22387863 |
| 6 | 1.91944070  | 1.55592547  | -2.53754111 |
| 6 | 0.89563327  | 1.25991102  | -1.60702487 |
| 6 | 0.76101552  | 1.41460574  | 2.25632930  |
| 8 | 0.45983737  | 1.81241568  | 3.31634607  |
| 8 | 3.00504583  | -1.31976515 | 1.72801288  |
| 6 | 2.27348997  | -0.51259558 | 1.28991304  |
| 1 | -2.07521705 | 0.92932235  | -1.46773391 |
| 1 | -3.86857945 | 0.63298523  | 0.20153585  |
| 1 | -3.52207373 | -0.86689164 | 2.17210561  |
| 1 | -1.38403165 | -2.12134071 | 2.40674752  |
| 1 | 0.39288614  | -1.89426603 | 0.69809784  |
| 1 | 0.86733509  | -2.15917406 | -1.93190641 |
| 1 | 2.68702040  | -1.61881283 | -3.52967228 |
| 1 | 3.34503024  | 0.75948664  | -3.92986942 |
| 1 | 2.21926614  | 2.59411917  | -2.69331617 |
| 7 | 0.30344883  | 2.24778554  | -0.76042770 |
| 8 | 3.73850596  | 2.40789901  | 0.79196635  |
| 1 | 0.73948711  | 3.16491143  | -0.83159848 |
| 1 | -0.71473675 | 2.31324390  | -0.77975861 |

### 3-TS4

E = -236.338710 E0 = -236.119324

|    |            |            |            |
|----|------------|------------|------------|
| 24 | 1.76858251 | 0.98503651 | 0.39009600 |
| 6  | 3.20293950 | 2.06220573 | 0.51852877 |

|   |             |             |             |
|---|-------------|-------------|-------------|
| 6 | -0.84210065 | -0.37366494 | -0.48087370 |
| 6 | -2.07161195 | 0.30435428  | -0.62643489 |
| 6 | -3.12191253 | 0.07155480  | 0.26621838  |
| 6 | -2.96157204 | -0.83836881 | 1.31972150  |
| 6 | -1.75145837 | -1.52449085 | 1.46644810  |
| 6 | -0.69828787 | -1.29954207 | 0.57242144  |
| 6 | 0.29204556  | -0.12557780 | -1.41952376 |
| 6 | 0.85395661  | -1.17441083 | -2.18078328 |
| 6 | 1.93328646  | -0.95516199 | -3.03824853 |
| 6 | 2.51061960  | 0.31801909  | -3.11588601 |
| 6 | 1.98135073  | 1.38250875  | -2.37492929 |
| 6 | 0.82216608  | 1.19238307  | -1.58786559 |
| 6 | 1.39512132  | 1.39681561  | 2.11532608  |
| 8 | 1.15830074  | 1.67224140  | 3.23195846  |
| 8 | 3.52722853  | -1.27916263 | 1.27084511  |
| 6 | 2.83375385  | -0.39686736 | 0.92537342  |
| 1 | -2.21985505 | 0.98294284  | -1.47077207 |
| 1 | -4.07001680 | 0.59555568  | 0.13495428  |
| 1 | -3.77840373 | -1.01141260 | 2.02171499  |
| 1 | -1.61737328 | -2.22965267 | 2.28784498  |
| 1 | 0.25058994  | -1.82273758 | 0.70084691  |
| 1 | 0.42495147  | -2.17232120 | -2.07941576 |
| 1 | 2.34925153  | -1.78331364 | -3.61196119 |
| 1 | 3.38708367  | 0.49001558  | -3.74094004 |
| 1 | 2.43200753  | 2.37430890  | -2.43260228 |
| 7 | 0.39121673  | 2.23524572  | -0.72013615 |
| 8 | 4.14494838  | 2.76288797  | 0.60755859  |
| 1 | 0.70016589  | 3.16957727  | -0.97887226 |
| 1 | -0.58999414 | 2.20768361  | -0.44314020 |

**3-IM4**

E = -236.340847 E0 = -236.121497

|    |             |             |             |
|----|-------------|-------------|-------------|
| 24 | 2.11415964  | 1.09840875  | 0.23554849  |
| 6  | 3.31773176  | 2.42125862  | 0.47242397  |
| 6  | -0.96085608 | -0.38939131 | -0.42239255 |
| 6  | -2.14757454 | 0.33811656  | -0.65084672 |
| 6  | -3.28191274 | 0.11748375  | 0.13893231  |
| 6  | -3.25007431 | -0.83354610 | 1.16517352  |
| 6  | -2.07910757 | -1.56711396 | 1.39430943  |
| 6  | -0.94314292 | -1.34740875 | 0.60998059  |
| 6  | 0.24336748  | -0.16596519 | -1.27266401 |
| 6  | 0.83519009  | -1.23123038 | -1.97918834 |
| 6  | 1.93313765  | -1.04336336 | -2.82773112 |
| 6  | 2.49305490  | 0.22931287  | -2.95638286 |
| 6  | 1.95425694  | 1.32481829  | -2.25927180 |
| 6  | 0.79932692  | 1.14271514  | -1.44990368 |
| 6  | 1.79505620  | 1.15279171  | 2.02347541  |
| 8  | 1.58646394  | 1.19162027  | 3.17807222  |
| 8  | 4.28840211  | -0.92854743 | 0.63649401  |
| 6  | 3.43737725  | -0.13567922 | 0.48228701  |
| 1  | -2.19518378 | 1.05081113  | -1.47812519 |
| 1  | -4.19474295 | 0.68248221  | -0.05690941 |
| 1  | -4.13263106 | -1.00202388 | 1.78381679  |
| 1  | -2.04350686 | -2.30260090 | 2.19936098  |
| 1  | -0.02201554 | -1.89608166 | 0.81423209  |
| 1  | 0.39824545  | -2.22530772 | -1.86841095 |
| 1  | 2.36141403  | -1.89158486 | -3.36069869 |
| 1  | 3.36100198  | 0.38791165  | -3.59762211 |
| 1  | 2.36903139  | 2.32353953  | -2.39874293 |
| 7  | 0.41339609  | 2.19745882  | -0.58251914 |
| 8  | 4.10347911  | 3.28430663  | 0.61790519  |
| 1  | 0.58527413  | 3.14238831  | -0.91890996 |

1 -0.50163850 2.09107233 -0.14422054

### 3-TS5

E = -236.331278 E0 = -236.113795

24 2.21788435 0.98212725 0.06675193  
6 3.31481653 2.35712905 0.48409621  
6 -0.99271332 -0.29743086 -0.31212946  
6 -2.21504803 0.30597321 -0.67277068  
6 -3.38215758 0.03944355 0.05203771  
6 -3.34946852 -0.83581140 1.14363202  
6 -2.14130699 -1.44505743 1.50607231  
6 -0.97316756 -1.17785124 0.78733862  
6 0.23956802 -0.05063662 -1.11574634  
6 0.98545622 -1.14117627 -1.63494840  
6 2.09185943 -0.96669485 -2.47224427  
6 2.53550943 0.33452396 -2.74445492  
6 1.83291221 1.45466619 -2.25842166  
6 0.66585591 1.27211440 -1.46461755  
6 1.77755892 0.90076773 1.82230857  
8 1.49030054 0.85915829 2.96024406  
8 4.48067040 -0.88449815 0.61424835  
6 3.59065423 -0.15323567 0.39486329  
1 -2.25703874 0.96800847 -1.54027475  
1 -4.32085588 0.50965044 -0.24583073  
1 -4.25907982 -1.04059271 1.71016543  
1 -2.10404380 -2.12033087 2.36223350  
1 -0.02860052 -1.63097126 1.09314249  
1 0.64989240 -2.14855010 -1.38193255  
1 2.64124264 -1.82973259 -2.84501969  
1 3.43069936 0.49825187 -3.34563625  
1 2.15918346 2.46334058 -2.51329710

|   |             |            |             |
|---|-------------|------------|-------------|
| 7 | 0.09801699  | 2.37709634 | -0.84821682 |
| 8 | 4.02373799  | 3.25383019 | 0.75628671  |
| 1 | 0.57155626  | 3.27143436 | -0.89280630 |
| 1 | -0.57704512 | 2.23826465 | -0.10357972 |

#### 4a

E = -236.383480 E0 = -236.163516

|    |             |             |             |
|----|-------------|-------------|-------------|
| 24 | -1.04225763 | 0.32923978  | 1.70442087  |
| 6  | -0.76706163 | 2.14172129  | 1.78514219  |
| 6  | -0.44523280 | -0.26563066 | -0.41951756 |
| 6  | -1.61398945 | 0.55291827  | -0.40355303 |
| 6  | -2.77810847 | 0.19424068  | 0.32269235  |
| 6  | -2.73412467 | -0.96120860 | 1.13867937  |
| 6  | -1.58121291 | -1.78691517 | 1.16086899  |
| 6  | -0.44655179 | -1.47825554 | 0.35516032  |
| 6  | 0.71391138  | 0.10574249  | -1.28518279 |
| 6  | 1.12074472  | -0.76487016 | -2.31629105 |
| 6  | 2.17191213  | -0.41280385 | -3.17050562 |
| 6  | 2.82686300  | 0.81386748  | -3.01235469 |
| 6  | 2.42647681  | 1.68635075  | -1.99271821 |
| 6  | 1.38147282  | 1.33530234  | -1.13213642 |
| 6  | -1.80681415 | 0.47957540  | 3.36946784  |
| 8  | -2.29841674 | 0.57963872  | 4.42453751  |
| 8  | 1.63832548  | -0.09308847 | 3.00004071  |
| 6  | 0.59045792  | 0.08546589  | 2.51154006  |
| 1  | -1.60243203 | 1.47248161  | -0.98837202 |
| 1  | -3.65130770 | 0.84334442  | 0.32202652  |
| 1  | -1.55497336 | -2.66465164 | 1.80611050  |
| 7  | 0.63401859  | -2.34033469 | 0.32478889  |
| 1  | 0.60263224  | -1.71562606 | -2.45553423 |
| 1  | 2.47206479  | -1.09635071 | -3.96657774 |



|   |             |             |             |
|---|-------------|-------------|-------------|
| 1 | 2.93687090  | 2.64136353  | -1.85733980 |
| 1 | 1.08850918  | 2.00614557  | -0.32294343 |
| 8 | -0.59663463 | 3.29813201  | 1.84033049  |
| 1 | 3.64688888  | 1.08758955  | -3.67808271 |
| 1 | -3.58471854 | -1.21780811 | 1.76882958  |
| 1 | 0.74083439  | -2.93193093 | 1.14405486  |
| 1 | 1.51185555  | -1.92364384 | 0.02241915  |

### Rotation

#### 3-TS(rot)

E = -236.368165 E0 = -236.148009

|    |             |             |             |
|----|-------------|-------------|-------------|
| 24 | -0.79668894 | 0.05352119  | 1.90747698  |
| 6  | -0.66357014 | 1.86551737  | 2.22512369  |
| 6  | -0.56679125 | -0.44178093 | -0.32264337 |
| 6  | -1.61671035 | 0.50089095  | -0.10368978 |
| 6  | -2.70219573 | 0.24647603  | 0.78716630  |
| 6  | -2.74910900 | -0.94650236 | 1.53351325  |
| 6  | -1.70327598 | -1.89830127 | 1.37455365  |
| 6  | -0.62741903 | -1.62829893 | 0.50250185  |
| 6  | 0.57886362  | -0.25284300 | -1.26096344 |
| 6  | 1.42354995  | -1.36190930 | -1.51192388 |
| 6  | 2.59896652  | -1.27840864 | -2.25360087 |
| 6  | 2.98136641  | -0.04448405 | -2.79006631 |
| 6  | 2.13988053  | 1.05149413  | -2.62828582 |
| 6  | 0.92862560  | 0.97333988  | -1.91089858 |
| 6  | -1.06289356 | -0.17572696 | 3.71373664  |
| 8  | -1.23641503 | -0.32472303 | 4.85890662  |
| 8  | 2.16227015  | -0.14798237 | 2.42199003  |
| 6  | 1.01498709  | -0.06712297 | 2.22701823  |
| 1  | -1.58509713 | 1.47840690  | -0.56758574 |
| 1  | -3.46027307 | 1.01469883  | 0.93144793  |

|   |             |             |             |
|---|-------------|-------------|-------------|
| 1 | -3.54873050 | -1.11862841 | 2.25229250  |
| 1 | -1.68560526 | -2.80108878 | 1.98318862  |
| 1 | 0.19162692  | -2.34120728 | 0.48761534  |
| 1 | 1.15305768  | -2.33818909 | -1.11407461 |
| 1 | 3.21146847  | -2.16775836 | -2.40326519 |
| 1 | 3.90843591  | 0.05813424  | -3.35576526 |
| 1 | 2.40362664  | 2.00777155  | -3.08801835 |
| 7 | 0.14917104  | 2.14544757  | -1.82808230 |
| 8 | -0.58644788 | 3.01279086  | 2.42193652  |
| 1 | 0.56194021  | 2.90560144  | -2.36610032 |
| 1 | -0.81661683 | 2.02086250  | -2.12350830 |

#### 4-TS(rot)

E = -236.369838 E0 = -236.149751

|    |             |             |             |
|----|-------------|-------------|-------------|
| 24 | -0.89930309 | 0.17989222  | 1.82266580  |
| 6  | -0.06660712 | 1.81542684  | 1.98080187  |
| 6  | -0.42596096 | -0.20337916 | -0.42573580 |
| 6  | -1.48386508 | 0.75108260  | -0.20221225 |
| 6  | -2.66933134 | 0.47686917  | 0.51158050  |
| 6  | -2.79194984 | -0.77290857 | 1.16543696  |
| 6  | -1.75801175 | -1.72029736 | 1.03352454  |
| 6  | -0.58176887 | -1.47046713 | 0.25194668  |
| 6  | 0.68835385  | 0.17650874  | -1.35315444 |
| 6  | 0.58822102  | 1.36989284  | -2.11171546 |
| 6  | 1.58992623  | 1.78094091  | -2.99182618 |
| 6  | 2.74303857  | 1.01023491  | -3.16835511 |
| 6  | 2.85688086  | -0.18638371 | -2.45829258 |
| 6  | 1.85439745  | -0.59524850 | -1.57311879 |
| 6  | -1.69777211 | 0.52226741  | 3.44080884  |
| 8  | -2.20782105 | 0.74645293  | 4.46771256  |
| 8  | 1.40800616  | -1.10457524 | 3.25983488  |

|   |             |             |             |
|---|-------------|-------------|-------------|
| 6 | 0.50717883  | -0.58453616 | 2.72378007  |
| 1 | -1.37848681 | 1.75063482  | -0.61183158 |
| 1 | -3.42454548 | 1.25074393  | 0.63383340  |
| 1 | -1.82566752 | -2.66620250 | 1.57158240  |
| 7 | 0.33324937  | -2.52347511 | 0.17006307  |
| 1 | -0.29438242 | 2.00196525  | -2.04343004 |
| 1 | 1.45981789  | 2.71158939  | -3.54662944 |
| 1 | 3.73620919  | -0.81978085 | -2.58654039 |
| 1 | 2.00653760  | -1.55393173 | -1.09319036 |
| 8 | 0.45642937  | 2.85472354  | 2.07475518  |
| 1 | 3.52955623  | 1.33061485  | -3.85271037 |
| 1 | -3.65558210 | -0.99488540 | 1.79046771  |
| 1 | 1.30363786  | -2.25471894 | 0.30844184  |
| 1 | 0.09961625  | -3.27905115 | 0.81150763  |
